# Supplementary material for: One-year oral toxicity study on a genetically modified maize MON810 variety in Wistar Han RCC rats (EU 7th Framework Programme project GRACE)
Source: PubMed Central journal article supplement (PMC5043003; doi:10.1007/s00204-016-1798-4), 2016-07-20

**ESM-Table 2:** Sampling order at the different points in time of the 1-year feeding trial

### 3 months

| Cage_ID | Anim_ID | Group_ID       | Sex | Date      | Time       |
|---------|---------|----------------|-----|-----------|------------|
| 1       | 1       | 33% GMO        | M   | 28.4.2014 | 7:00-10:00 |
|         | 2       | 33% GMO        | M   | 28.4.2014 | 7:00-10:00 |
| 4       | 7       | 33% GMO        | M   | 28.4.2014 | 7:00-10:00 |
|         | 8       | 33% GMO        | M   | 28.4.2014 | 7:00-10:00 |
| 12      | 23      | 11% GMO        | M   | 28.4.2014 | 7:00-10:00 |
|         | 24      | 11% GMO        | M   | 28.4.2014 | 7:00-10:00 |
| 13      | 25      | 11% GMO        | M   | 28.4.2014 | 7:00-10:00 |
|         | 26      | 11% GMO        | M   | 28.4.2014 | 7:00-10:00 |
| 21      | 41      | control        | M   | 28.4.2014 | 7:00-10:00 |
|         | 42      | control        | M   | 28.4.2014 | 7:00-10:00 |
| 22      | 43      | control        | M   | 28.4.2014 | 7:00-10:00 |
|         | 44      | control        | M   | 28.4.2014 | 7:00-10:00 |
| 31      | 61      | conventional 2 | M   | 28.4.2014 | 7:00-10:00 |
|         | 62      | conventional 2 | M   | 28.4.2014 | 7:00-10:00 |
| 34      | 67      | conventional 2 | M   | 28.4.2014 | 7:00-10:00 |
|         | 68      | conventional 2 | M   | 28.4.2014 | 7:00-10:00 |
| 5       | 9       | 33% GMO        | M   | 29.4.2014 | 7:00-9:40  |
|         | 10      | 33% GMO        | M   | 29.4.2014 | 7:00-9:40  |
| 9       | 17      | 33% GMO        | M   | 29.4.2014 | 7:00-9:40  |
|         | 18      | 33% GMO        | M   | 29.4.2014 | 7:00-9:40  |
| 15      | 29      | 11% GMO        | M   | 29.4.2014 | 7:00-9:40  |
|         | 30      | 11% GMO        | M   | 29.4.2014 | 7:00-9:40  |
| 17      | 33      | 11% GMO        | M   | 29.4.2014 | 7:00-9:40  |
|         | 34      | 11% GMO        | M   | 29.4.2014 | 7:00-9:40  |
| 25      | 49      | control        | M   | 29.4.2014 | 7:00-9:40  |
|         | 50      | control        | M   | 29.4.2014 | 7:00-9:40  |
| 26      | 51      | control        | M   | 29.4.2014 | 7:00-9:40  |
|         | 52      | control        | M   | 29.4.2014 | 7:00-9:40  |
| 36      | 71      | conventional 2 | M   | 29.4.2014 | 7:00-9:40  |
|         | 72      | conventional 2 | M   | 29.4.2014 | 7:00-9:40  |
| 38      | 75      | conventional 2 | M   | 29.4.2014 | 7:00-9:40  |
|         | 76      | conventional 2 | M   | 29.4.2014 | 7:00-9:40  |
| 10      | 19      | 33% GMO        | M   | 30.4.2014 | 7:00-9:50  |
|         | 20      | 33% GMO        | M   | 30.4.2014 | 7:00-9:50  |
| 51      | 101     | 33% GMO        | F   | 30.4.2014 | 7:00-9:50  |
|         | 102     | 33% GMO        | F   | 30.4.2014 | 7:00-9:50  |
| 19      | 37      | 11% GMO        | M   | 30.4.2014 | 7:00-9:50  |
|         | 38      | 11% GMO        | M   | 30.4.2014 | 7:00-9:50  |
| 62      | 123     | 11% GMO        | F   | 30.4.2014 | 7:00-9:50  |
|         | 124     | 11% GMO        | F   | 30.4.2014 | 7:00-9:50  |
| 28      | 55      | control        | M   | 30.4.2014 | 7:00-9:50  |
|         | 56      | control        | M   | 30.4.2014 | 7:00-9:50  |
| 72      | 145     | control        | F   | 30.4.2014 | 7:00-9:50  |

**Sampling order**

|    |     |                |   |           |            |
|----|-----|----------------|---|-----------|------------|
| 39 | 146 | control        | F | 30.4.2014 | 7:00-9:50  |
| 39 | 77  | conventional 2 | M | 30.4.2014 | 7:00-9:50  |
|    | 78  | conventional 2 | M | 30.4.2014 | 7:00-9:50  |
| 81 | 161 | conventional 2 | F | 30.4.2014 | 7:00-9:50  |
|    | 162 | conventional 2 | F | 30.4.2014 | 7:00-9:50  |
| 52 | 103 | 33% GMO        | F | 1.5.2014  | 7:00-10:00 |
|    | 104 | 33% GMO        | F | 1.5.2014  | 7:00-10:00 |
| 54 | 107 | 33% GMO        | F | 1.5.2014  | 7:00-10:00 |
|    | 108 | 33% GMO        | F | 1.5.2014  | 7:00-10:00 |
| 64 | 127 | 11% GMO        | F | 1.5.2014  | 7:00-10:00 |
|    | 128 | 11% GMO        | F | 1.5.2014  | 7:00-10:00 |
| 68 | 135 | 11% GMO        | F | 1.5.2014  | 7:00-10:00 |
|    | 136 | 11% GMO        | F | 1.5.2014  | 7:00-10:00 |
| 74 | 147 | control        | F | 1.5.2014  | 7:00-10:00 |
|    | 148 | control        | F | 1.5.2014  | 7:00-10:00 |
| 76 | 151 | control        | F | 1.5.2014  | 7:00-10:00 |
|    | 152 | control        | F | 1.5.2014  | 7:00-10:00 |
| 83 | 165 | conventional 2 | F | 1.5.2014  | 7:00-10:00 |
|    | 166 | conventional 2 | F | 1.5.2014  | 7:00-10:00 |
| 85 | 169 | conventional 2 | F | 1.5.2014  | 7:00-10:00 |
|    | 170 | conventional 2 | F | 1.5.2014  | 7:00-10:00 |
| 55 | 109 | 33% GMO        | F | 2.5.2014  | 7:00- 8:35 |
|    | 110 | 33% GMO        | F | 2.5.2014  | 7:00- 8:35 |
| 57 | 113 | 33% GMO        | F | 2.5.2014  | 7:00- 8:35 |
|    | 114 | 33% GMO        | F | 2.5.2014  | 7:00- 8:35 |
| 69 | 137 | 11% GMO        | F | 2.5.2014  | 7:00- 8:35 |
|    | 138 | 11% GMO        | F | 2.5.2014  | 7:00- 8:35 |
| 70 | 139 | 11% GMO        | F | 2.5.2014  | 7:00- 8:35 |
|    | 140 | 11% GMO        | F | 2.5.2014  | 7:00- 8:35 |
| 79 | 157 | control        | F | 2.5.2014  | 7:00- 8:35 |
|    | 158 | control        | F | 2.5.2014  | 7:00- 8:35 |
| 80 | 159 | control        | F | 2.5.2014  | 7:00- 8:35 |
|    | 160 | control        | F | 2.5.2014  | 7:00- 8:35 |
| 88 | 175 | conventional 2 | F | 2.5.2014  | 7:00- 8:35 |
|    | 176 | conventional 2 | F | 2.5.2014  | 7:00- 8:35 |
| 89 | 177 | conventional 2 | F | 2.5.2014  | 7:00- 8:35 |
|    | 178 | conventional 2 | F | 2.5.2014  | 7:00- 8:35 |

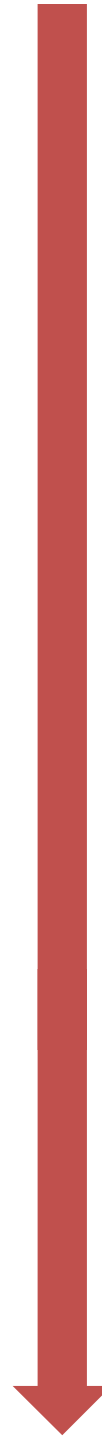

## 6 months

| Cage_ID | Anim_ID | Group_ID       | Sex | Date       | Time      |
|---------|---------|----------------|-----|------------|-----------|
| 1       | 1       | 33% GMO        | M   | 21.07.2014 | 7:00-9:20 |
|         | 2       | 33% GMO        | M   | 21.07.2014 | 7:00-9:20 |
| 4       | 7       | 33% GMO        | M   | 21.07.2014 | 7:00-9:20 |
|         | 8       | 33% GMO        | M   | 21.07.2014 | 7:00-9:20 |
| 12      | 23      | 11% GMO        | M   | 21.07.2014 | 7:00-9:20 |
|         | 24      | 11% GMO        | M   | 21.07.2014 | 7:00-9:20 |
| 13      | 25      | 11% GMO        | M   | 21.07.2014 | 7:00-9:20 |
|         | 26      | 11% GMO        | M   | 21.07.2014 | 7:00-9:20 |
| 21      | 41      | control        | M   | 21.07.2014 | 7:00-9:20 |
|         | 42      | control        | M   | 21.07.2014 | 7:00-9:20 |
| 22      | 43      | control        | M   | 21.07.2014 | 7:00-9:20 |
|         | 44      | control        | M   | 21.07.2014 | 7:00-9:20 |
| 31      | 61      | conventional 2 | M   | 21.07.2014 | 7:00-9:20 |
|         | 62      | conventional 2 | M   | 21.07.2014 | 7:00-9:20 |
| 34      | 67      | conventional 2 | M   | 21.07.2014 | 7:00-9:20 |
|         | 68      | conventional 2 | M   | 21.07.2014 | 7:00-9:20 |
| 5       | 9       | 33% GMO        | M   | 22.07.2014 | 7:00-9:00 |
|         | 10      | 33% GMO        | M   | 22.07.2014 | 7:00-9:00 |
| 9       | 17      | 33% GMO        | M   | 22.07.2014 | 7:00-9:00 |
|         | 18      | 33% GMO        | M   | 22.07.2014 | 7:00-9:00 |
| 15      | 29      | 11% GMO        | M   | 22.07.2014 | 7:00-9:00 |
|         | 30      | 11% GMO        | M   | 22.07.2014 | 7:00-9:00 |
| 17      | 33      | 11% GMO        | M   | 22.07.2014 | 7:00-9:00 |
|         | 34      | 11% GMO        | M   | 22.07.2014 | 7:00-9:00 |
| 25      | 49      | control        | M   | 22.07.2014 | 7:00-9:00 |
|         | 50      | control        | M   | 22.07.2014 | 7:00-9:00 |
| 26      | 51      | control        | M   | 22.07.2014 | 7:00-9:00 |
|         | 52      | control        | M   | 22.07.2014 | 7:00-9:00 |
| 36      | 71      | conventional 2 | M   | 22.07.2014 | 7:00-9:00 |
|         | 72      | conventional 2 | M   | 22.07.2014 | 7:00-9:00 |
| 38      | 75      | conventional 2 | M   | 22.07.2014 | 7:00-9:00 |
|         | 76      | conventional 2 | M   | 22.07.2014 | 7:00-9:00 |
| 10      | 19      | 33% GMO        | M   | 23.07.2014 | 7:00-9:00 |
|         | 20      | 33% GMO        | M   | 23.07.2014 | 7:00-9:00 |
| 51      | 101     | 33% GMO        | F   | 23.07.2014 | 7:00-9:00 |
|         | 102     | 33% GMO        | F   | 23.07.2014 | 7:00-9:00 |
| 19      | 37      | 11% GMO        | M   | 23.07.2014 | 7:00-9:00 |
|         | 38      | 11% GMO        | M   | 23.07.2014 | 7:00-9:00 |
| 62      | 123     | 11% GMO        | F   | 23.07.2014 | 7:00-9:00 |
|         | 124     | 11% GMO        | F   | 23.07.2014 | 7:00-9:00 |
| 28      | 55      | control        | M   | 23.07.2014 | 7:00-9:00 |
|         | 56      | control        | M   | 23.07.2014 | 7:00-9:00 |
| 73      | 145     | control        | F   | 23.07.2014 | 7:00-9:00 |
|         | 146     | control        | F   | 23.07.2014 | 7:00-9:00 |
| 20      | 77      | conventional 2 | M   | 23.07.2014 | 7:00-9:00 |

Sampling order

|    |     |                |   |            |            |
|----|-----|----------------|---|------------|------------|
| 53 | 78  | conventional 2 | M | 23.07.2014 | 7:00-9:00  |
| 81 | 161 | conventional 2 | F | 23.07.2014 | 7:00-9:00  |
|    | 162 | conventional 2 | F | 23.07.2014 | 7:00-9:00  |
| 52 | 103 | 33% GMO        | F | 24.07.2014 | 7:00-9:00  |
|    | 104 | 33% GMO        | F | 24.07.2014 | 7:00-9:00  |
| 54 | 107 | 33% GMO        | F | 24.07.2014 | 7:00-9:00  |
|    | 108 | 33% GMO        | F | 24.07.2014 | 7:00-9:00  |
| 64 | 127 | 11% GMO        | F | 24.07.2014 | 7:00-9:00  |
|    | 128 | 11% GMO        | F | 24.07.2014 | 7:00-9:00  |
| 68 | 135 | 11% GMO        | F | 24.07.2014 | 7:00-9:00  |
|    | 136 | 11% GMO        | F | 24.07.2014 | 7:00-9:00  |
| 74 | 147 | control        | F | 24.07.2014 | 7:00-9:00  |
|    | 148 | control        | F | 24.07.2014 | 7:00-9:00  |
| 76 | 151 | control        | F | 24.07.2014 | 7:00-9:00  |
|    | 152 | control        | F | 24.07.2014 | 7:00-9:00  |
| 83 | 165 | conventional 2 | F | 24.07.2014 | 7:00-9:00  |
|    | 166 | conventional 2 | F | 24.07.2014 | 7:00-9:00  |
| 85 | 169 | conventional 2 | F | 24.07.2014 | 7:00-9:00  |
|    | 170 | conventional 2 | F | 24.07.2014 | 7:00-9:00  |
| 55 | 109 | 33% GMO        | F | 25.07.2014 | 7:00-10:00 |
|    | 110 | 33% GMO        | F | 25.07.2014 | 7:00-10:00 |
| 57 | 113 | 33% GMO        | F | 25.07.2014 | 7:00-10:00 |
|    | 114 | 33% GMO        | F | 25.07.2014 | 7:00-10:00 |
| 69 | 137 | 11% GMO        | F | 25.07.2014 | 7:00-10:00 |
|    | 138 | 11% GMO        | F | 25.07.2014 | 7:00-10:00 |
| 70 | 139 | 11% GMO        | F | 25.07.2014 | 7:00-10:00 |
|    | 140 | 11% GMO        | F | 25.07.2014 | 7:00-10:00 |
| 79 | 157 | control        | F | 25.07.2014 | 7:00-10:00 |
|    | 158 | control        | F | 25.07.2014 | 7:00-10:00 |
| 80 | 159 | control        | F | 25.07.2014 | 7:00-10:00 |
|    | 160 | control        | F | 25.07.2014 | 7:00-10:00 |
| 88 | 175 | conventional 2 | F | 25.07.2014 | 7:00-10:00 |
|    | 176 | conventional 2 | F | 25.07.2014 | 7:00-10:00 |
| 89 | 177 | conventional 2 | F | 25.07.2014 | 7:00-10:00 |
|    | 178 | conventional 2 | F | 25.07.2014 | 7:00-10:00 |

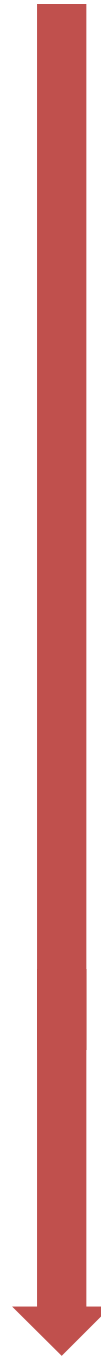

# 12 months

| Cage_ID | Anim_ID | Group_ID       | Sex | Date       | Time       |
|---------|---------|----------------|-----|------------|------------|
| 1       | 1       | 33% GMO        | M   | 19.01.2015 | 7:30-8:00  |
| 1       | 2       | 33% GMO        | M   | 19.01.2015 | 7:30-8:00  |
| 4       | 7       | 33% GMO        | M   | 19.01.2015 | 7:30-8:00  |
| 4       | 8       | 33% GMO        | M   | 19.01.2015 | 7:30-8:00  |
| 12      | 23      | 11% GMO        | M   | 19.01.2015 | 7:30-8:00  |
| 12      | 24      | 11% GMO        | M   | 19.01.2015 | 7:30-8:00  |
| 13      | 25      | 11% GMO        | M   | 19.01.2015 | 7:30-8:00  |
| 13      | 26      | 11% GMO        | M   | 19.01.2015 | 7:30-8:00  |
| 21      | 41      | control        | M   | 19.01.2015 | 8:00-8:30  |
| 21      | 42      | control        | M   | 19.01.2015 | 8:00-8:30  |
| 22      | 43      | control        | M   | 19.01.2015 | 8:00-8:30  |
| 22      | 44      | control        | M   | 19.01.2015 | 8:00-8:30  |
| 31      | 61      | conventional 2 | M   | 19.01.2015 | 8:00-8:30  |
| 31      | 62      | conventional 2 | M   | 19.01.2015 | 8:00-8:30  |
| 34      | 67      | conventional 2 | M   | 19.01.2015 | 8:00-8:30  |
| 34      | 68      | conventional 2 | M   | 19.01.2015 | 8:00-8:30  |
| 2       | 3       | 33% GMO        | M   | 19.01.2015 | 9:00-9:30  |
| 2       | 4       | 33% GMO        | M   | 19.01.2015 | 9:00-9:30  |
| 3       | 5       | 33% GMO        | M   | 19.01.2015 | 9:00-9:30  |
| 2       | 6       | 33% GMO        | M   | 19.01.2015 | 9:00-9:30  |
| 11      | 21      | 11% GMO        | M   | 19.01.2015 | 9:00-9:30  |
| 11      | 22      | 11% GMO        | M   | 19.01.2015 | 9:00-9:30  |
| 14      | 27      | 11% GMO        | M   | 19.01.2015 | 9:00-9:30  |
| 14      | 28      | 11% GMO        | M   | 19.01.2015 | 9:00-9:30  |
| 23      | 45      | control        | M   | 19.01.2015 | 9:30-10:00 |
| 23      | 46      | control        | M   | 19.01.2015 | 9:30-10:00 |
| 24      | 47      | control        | M   | 19.01.2015 | 9:30-10:00 |
| 24      | 48      | control        | M   | 19.01.2015 | 9:30-10:00 |
| 32      | 63      | conventional 2 | M   | 19.01.2015 | 9:30-10:00 |
| 32      | 64      | conventional 2 | M   | 19.01.2015 | 9:30-10:00 |
| 33      | 65      | conventional 2 | M   | 19.01.2015 | 9:30-10:00 |
| 33      | 66      | conventional 2 | M   | 19.01.2015 | 9:30-10:00 |
| 5       | 9       | 33% GMO        | M   | 20.01.2015 | 7:30-8:00  |
| 5       | 10      | 33% GMO        | M   | 20.01.2015 | 7:30-8:00  |
| 9       | 17      | 33% GMO        | M   | 20.01.2015 | 7:30-8:00  |
| 9       | 18      | 33% GMO        | M   | 20.01.2015 | 7:30-8:00  |
| 15      | 29      | 11% GMO        | M   | 20.01.2015 | 7:30-8:00  |
| 15      | 30      | 11% GMO        | M   | 20.01.2015 | 7:30-8:00  |
| 17      | 33      | 11% GMO        | M   | 20.01.2015 | 7:30-8:00  |
| 17      | 34      | 11% GMO        | M   | 20.01.2015 | 7:30-8:00  |
| 25      | 49      | control        | M   | 20.01.2015 | 8:00-8:30  |
| 25      | 50      | control        | M   | 20.01.2015 | 8:00-8:30  |
| 26      | 51      | control        | M   | 20.01.2015 | 8:00-8:30  |
| 26      | 52      | control        | M   | 20.01.2015 | 8:00-8:30  |
| 36      | 71      | conventional 2 | M   | 20.01.2015 | 8:00-8:30  |

**Sampling order**

|    |     |                |   |            |            |
|----|-----|----------------|---|------------|------------|
| 36 | 72  | conventional 2 | M | 20.01.2015 | 8:00-8:30  |
| 38 | 75  | conventional 2 | M | 20.01.2015 | 8:00-8:30  |
| 38 | 76  | conventional 2 | M | 20.01.2015 | 8:00-8:30  |
| 6  | 11  | 33% GMO        | M | 20.01.2015 | 9:00-9:30  |
| 6  | 12  | 33% GMO        | M | 20.01.2015 | 9:00-9:30  |
| 7  | 13  | 33% GMO        | M | 20.01.2015 | 9:00-9:30  |
| 7  | 14  | 33% GMO        | M | 20.01.2015 | 9:00-9:30  |
| 16 | 31  | 11% GMO        | M | 20.01.2015 | 9:00-9:30  |
| 16 | 32  | 11% GMO        | M | 20.01.2015 | 9:00-9:30  |
| 18 | 35  | 11% GMO        | M | 20.01.2015 | 9:00-9:30  |
| 18 | 36  | 11% GMO        | M | 20.01.2015 | 9:00-9:30  |
| 27 | 53  | control        | M | 20.01.2015 | 9:30-10:00 |
| 27 | 54  | control        | M | 20.01.2015 | 9:30-10:00 |
| 29 | 57  | control        | M | 20.01.2015 | 9:30-10:00 |
| 29 | 58  | control        | M | 20.01.2015 | 9:30-10:00 |
| 35 | 69  | conventional 2 | M | 20.01.2015 | 9:30-10:00 |
| 35 | 70  | conventional 2 | M | 20.01.2015 | 9:30-10:00 |
| 37 | 73  | conventional 2 | M | 20.01.2015 | 9:30-10:00 |
| 37 | 74  | conventional 2 | M | 20.01.2015 | 9:30-10:00 |
| 10 | 19  | 33% GMO        | M | 21.01.2015 | 7:30-8:00  |
| 10 | 20  | 33% GMO        | M | 21.01.2015 | 7:30-8:00  |
| 19 | 37  | 11% GMO        | M | 21.01.2015 | 7:30-8:00  |
| 19 | 38  | 11% GMO        | M | 21.01.2015 | 7:30-8:00  |
| 51 | 101 | 33% GMO        | F | 21.01.2015 | 7:30-8:00  |
| 51 | 102 | 33% GMO        | F | 21.01.2015 | 7:30-8:00  |
| 62 | 123 | 11% GMO        | F | 21.01.2015 | 7:30-8:00  |
| 62 | 124 | 11% GMO        | F | 21.01.2015 | 7:30-8:00  |
| 28 | 55  | control        | M | 21.01.2015 | 8:00-8:30  |
| 28 | 56  | control        | M | 21.01.2015 | 8:00-8:30  |
| 39 | 77  | conventional 2 | M | 21.01.2015 | 8:00-8:30  |
| 39 | 78  | conventional 2 | M | 21.01.2015 | 8:00-8:30  |
| 73 | 145 | control        | F | 21.01.2015 | 8:00-8:30  |
| 73 | 146 | control        | F | 21.01.2015 | 8:00-8:30  |
| 81 | 161 | conventional 2 | F | 21.01.2015 | 8:00-8:30  |
| 81 | 162 | conventional 2 | F | 21.01.2015 | 8:00-8:30  |
| 8  | 16  | 33% GMO        | M | 21.01.2015 | 8:30-9:00  |
| 20 | 39  | 11% GMO        | M | 21.01.2015 | 8:30-9:00  |
| 20 | 40  | 11% GMO        | M | 21.01.2015 | 8:30-9:00  |
| 60 | 119 | 33% GMO        | F | 21.01.2015 | 8:30-9:00  |
| 60 | 120 | 33% GMO        | F | 21.01.2015 | 8:30-9:00  |
| 67 | 133 | 11% GMO        | F | 21.01.2015 | 8:30-9:00  |
| 67 | 134 | 11% GMO        | F | 21.01.2015 | 9:00-9:30  |
| 30 | 59  | control        | M | 21.01.2015 | 9:00-9:30  |
| 30 | 60  | control        | M | 21.01.2015 | 9:00-9:30  |
| 40 | 79  | conventional 2 | M | 21.01.2015 | 9:00-9:30  |
| 40 | 80  | conventional 2 | M | 21.01.2015 | 9:00-9:30  |
| 78 | 155 | control        | F | 21.01.2015 | 9:00-9:30  |
| 78 | 156 | control        | F | 21.01.2015 | 9:00-9:30  |
| 90 | 179 | conventional 2 | F | 21.01.2015 | 9:00-9:30  |
| 90 | 180 | conventional 2 | F | 21.01.2015 | 9:00-9:30  |

|    |     |                |   |            |            |
|----|-----|----------------|---|------------|------------|
| 52 | 103 | 33% GMO        | F | 22.01.2015 | 7:30-8:00  |
| 52 | 104 | 33% GMO        | F | 22.01.2015 | 7:30-8:00  |
| 54 | 107 | 33% GMO        | F | 22.01.2015 | 7:30-8:00  |
| 54 | 108 | 33% GMO        | F | 22.01.2015 | 7:30-8:00  |
| 64 | 127 | 11% GMO        | F | 22.01.2015 | 7:30-8:00  |
| 64 | 128 | 11% GMO        | F | 22.01.2015 | 7:30-8:00  |
| 68 | 135 | 11% GMO        | F | 22.01.2015 | 8:00-8:30  |
| 68 | 136 | 11% GMO        | F | 22.01.2015 | 8:00-8:30  |
| 74 | 147 | control        | F | 22.01.2015 | 8:00-8:30  |
| 74 | 148 | control        | F | 22.01.2015 | 8:00-8:30  |
| 76 | 151 | control        | F | 22.01.2015 | 8:00-8:30  |
| 76 | 152 | control        | F | 22.01.2015 | 8:00-8:30  |
| 83 | 165 | conventional 2 | F | 22.01.2015 | 8:00-8:30  |
| 83 | 166 | conventional 2 | F | 22.01.2015 | 8:00-8:30  |
| 85 | 169 | conventional 2 | F | 22.01.2015 | 8:30-9:00  |
| 85 | 170 | conventional 2 | F | 22.01.2015 | 8:30-9:00  |
| 53 | 105 | 33% GMO        | F | 22.01.2015 | 8:30-9:00  |
| 53 | 106 | 33% GMO        | F | 22.01.2015 | 8:30-9:00  |
| 56 | 111 | 33% GMO        | F | 22.01.2015 | 8:30-9:00  |
| 56 | 112 | 33% GMO        | F | 22.01.2015 | 8:30-9:00  |
| 61 | 121 | 11% GMO        | F | 22.01.2015 | 9:00-9:30  |
| 61 | 122 | 11% GMO        | F | 22.01.2015 | 9:00-9:30  |
| 63 | 125 | 11% GMO        | F | 22.01.2015 | 9:00-9:30  |
| 63 | 126 | 11% GMO        | F | 22.01.2015 | 9:00-9:30  |
| 71 | 141 | control        | F | 22.01.2015 | 9:00-9:30  |
| 71 | 142 | control        | F | 22.01.2015 | 9:00-9:30  |
| 72 | 143 | control        | F | 22.01.2015 | 9:00-9:30  |
| 72 | 144 | control        | F | 22.01.2015 | 9:00-9:30  |
| 82 | 163 | conventional 2 | F | 22.01.2015 | 9:30-10:00 |
| 82 | 164 | conventional 2 | F | 22.01.2015 | 9:30-10:00 |
| 84 | 167 | conventional 2 | F | 22.01.2015 | 9:30-10:00 |
| 84 | 168 | conventional 2 | F | 22.01.2015 | 9:30-10:00 |
| 55 | 109 | 33% GMO        | F | 23.01.2015 | 7:15-7:45  |
| 55 | 110 | 33% GMO        | F | 23.01.2015 | 7:15-7:45  |
| 57 | 113 | 33% GMO        | F | 23.01.2015 | 7:15-7:45  |
| 57 | 114 | 33% GMO        | F | 23.01.2015 | 7:15-7:45  |
| 69 | 137 | 11% GMO        | F | 23.01.2015 | 7:15-7:45  |
| 69 | 138 | 11% GMO        | F | 23.01.2015 | 7:15-7:45  |
| 70 | 139 | 11% GMO        | F | 23.01.2015 | 7:15-7:45  |
| 70 | 140 | 11% GMO        | F | 23.01.2015 | 7:15-7:45  |
| 79 | 157 | control        | F | 23.01.2015 | 7:45-8:30  |
| 79 | 158 | control        | F | 23.01.2015 | 7:45-8:30  |
| 80 | 160 | control        | F | 23.01.2015 | 7:45-8:30  |
| 88 | 175 | conventional 2 | F | 23.01.2015 | 7:45-8:30  |
| 88 | 176 | conventional 2 | F | 23.01.2015 | 7:45-8:30  |
| 89 | 177 | conventional 2 | F | 23.01.2015 | 7:45-8:30  |
| 89 | 178 | conventional 2 | F | 23.01.2015 | 7:45-8:30  |
| 58 | 115 | 33% GMO        | F | 23.01.2015 | 8:30-9:00  |
| 58 | 116 | 33% GMO        | F | 23.01.2015 | 8:30-9:00  |
| 59 | 117 | 33% GMO        | F | 23.01.2015 | 8:30-9:00  |

|    |     |                |   |            |            |
|----|-----|----------------|---|------------|------------|
| 59 | 118 | 33% GMO        | F | 23.01.2015 | 8:30-9:00  |
| 65 | 129 | 11% GMO        | F | 23.01.2015 | 8:30-9:00  |
| 65 | 130 | 11% GMO        | F | 23.01.2015 | 8:30-9:00  |
| 66 | 132 | 11% GMO        | F | 23.01.2015 | 9:00-9:30  |
| 75 | 149 | control        | F | 23.01.2015 | 9:00-9:30  |
| 75 | 150 | control        | F | 23.01.2015 | 9:00-9:30  |
| 77 | 153 | control        | F | 23.01.2015 | 9:00-9:30  |
| 77 | 154 | control        | F | 23.01.2015 | 9:00-9:30  |
| 86 | 171 | conventional 2 | F | 23.01.2015 | 9:00-9:30  |
| 86 | 172 | conventional 2 | F | 23.01.2015 | 9:00-9:30  |
| 87 | 173 | conventional 2 | F | 23.01.2015 | 9:00-9:30  |
| 87 | 174 | conventional 2 | F | 23.01.2015 | 9:30-10:00 |

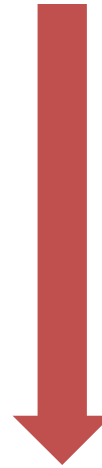



# Necropsy

| Cage_ID | Anim_ID | Group_ID       | Sex | Blood taking Start-h | Day Necropsy | Date necropsy |
|---------|---------|----------------|-----|----------------------|--------------|---------------|
| 16      | 31      | 11% GMO        | M   | 09:56                | 366          | 27.01.2015    |
| 16      | 32      | 11% GMO        | M   | 10:20                | 366          | 27.01.2015    |
| 21      | 41      | control        | M   | 10:44                | 366          | 27.01.2015    |
| 21      | 42      | control        | M   | 10:59                | 366          | 27.01.2015    |
| 31      | 61      | conventional 2 | M   | 11:15                | 366          | 27.01.2015    |
| 31      | 62      | conventional 2 | M   | 11:29                | 366          | 27.01.2015    |
| 10      | 19      | 33% GMO        | M   | 11:53                | 366          | 27.01.2015    |
| 10      | 20      | 33% GMO        | M   | 12:05                | 366          | 27.01.2015    |
| 28      | 55      | control        | M   | 13:31                | 366          | 27.01.2015    |
| 28      | 56      | control        | M   | 13:57                | 366          | 27.01.2015    |
| 40      | 79      | conventional 2 | M   | 14:15                | 366          | 27.01.2015    |
| 40      | 80      | conventional 2 | M   | 14:25                | 366          | 27.01.2015    |
| 14      | 27      | 11% GMO        | M   | 14:43                | 366          | 27.01.2015    |
| 14      | 28      | 11% GMO        | M   | 14:50                | 366          | 27.01.2015    |
| 4       | 7       | 33% GMO        | M   | 15:05                | 366          | 27.01.2015    |
| 4       | 8       | 33% GMO        | M   | 15:20                | 366          | 27.01.2015    |
| 65      | 129     | 11% GMO        | F   | 07:35                | 366          | 28.01.2015    |
| 65      | 130     | 11% GMO        | F   | 07:43                | 366          | 28.01.2015    |
| 56      | 111     | 33% GMO        | F   | 08:30                | 366          | 28.01.2015    |
| 56      | 112     | 33% GMO        | F   | 08:46                | 366          | 28.01.2015    |
| 86      | 171     | conventional 2 | F   | 9:05                 | 366          | 28.01.2015    |
| 86      | 172     | conventional 2 | F   | 9:16                 | 366          | 28.01.2015    |
| 76      | 151     | control        | F   | 9:35                 | 366          | 28.01.2015    |
| 76      | 152     | control        | F   | 9:57                 | 366          | 28.01.2015    |
| 64      | 127     | 11% GMO        | F   | 12:00                | 366          | 28.01.2015    |
| 64      | 128     | 11% GMO        | F   | 12:15                | 366          | 28.01.2015    |
| 54      | 107     | 33% GMO        | F   | 12:27                | 366          | 28.01.2015    |
| 54      | 108     | 33% GMO        | F   | 12:37                | 366          | 28.01.2015    |
| 88      | 175     | conventional 2 | F   | 12:45                | 366          | 28.01.2015    |
| 88      | 176     | conventional 2 | F   | 13:15                | 366          | 28.01.2015    |
| 73      | 145     | control        | F   | 13:22                | 366          | 28.01.2015    |
| 73      | 146     | control        | F   | 13:34                | 366          | 28.01.2015    |
| 32      | 64      | conventional 2 | M   | 8:05                 | 368          | 29.01.2015    |
| 32      | 63      | conventional 2 | M   | 8:25                 | 368          | 29.01.2015    |
| 5       | 9       | 33% GMO        | M   | 09:02                | 368          | 29.01.2015    |
| 5       | 10      | 33% GMO        | M   | 09:10                | 368          | 29.01.2015    |
| 23      | 45      | control        | M   | 9:22                 | 368          | 29.01.2015    |
| 23      | 46      | control        | M   | 9:38                 | 368          | 29.01.2015    |
| 17      | 33      | 11% GMO        | M   | 10:15                | 368          | 29.01.2015    |
| 17      | 34      | 11% GMO        | M   | 10:21                | 368          | 29.01.2015    |
| 35      | 69      | conventional 2 | M   | 12:25                | 368          | 29.01.2015    |
| 35      | 70      | conventional 2 | M   | 12:31                | 368          | 29.01.2015    |
| 3       | 6       | 33% GMO        | M   | 12:50                | 368          | 29.01.2015    |
| 3       | 5       | 33% GMO        | M   | 13:01                | 368          | 29.01.2015    |

Sampling order

|    |     |                |   |       |     |            |
|----|-----|----------------|---|-------|-----|------------|
| 18 | 35  | 11% GMO        | M | 13:19 | 368 | 29.01.2015 |
| 18 | 36  | 11% GMO        | M | 13:28 | 368 | 29.01.2015 |
| 30 | 59  | control        | M | 13:54 | 368 | 29.01.2015 |
| 30 | 60  | control        | M | 14:10 | 368 | 29.01.2015 |
| 62 | 123 | 11% GMO        | F | 08:20 | 368 | 30.01.2015 |
| 74 | 148 | control        | F | 8:43  | 368 | 30.01.2015 |
| 62 | 124 | 11% GMO        | F | 08:50 | 368 | 30.01.2015 |
| 74 | 147 | control        | F | 9:05  | 368 | 30.01.2015 |
| 52 | 103 | 33% GMO        | F | 09:35 | 368 | 30.01.2015 |
| 52 | 104 | 33% GMO        | F | 09:47 | 368 | 30.01.2015 |
| 82 | 163 | conventional 2 | F | 9:54  | 368 | 30.01.2015 |
| 82 | 164 | conventional 2 | F | 10:05 | 368 | 30.01.2015 |
| 53 | 105 | 33% GMO        | F | 12:15 | 368 | 30.01.2015 |
| 53 | 106 | 33% GMO        | F | 12:25 | 368 | 30.01.2015 |
| 71 | 141 | control        | F | 12:37 | 368 | 30.01.2015 |
| 71 | 142 | control        | F | 12:50 | 368 | 30.01.2015 |
| 89 | 177 | conventional 2 | F | 13:00 | 368 | 30.01.2015 |
| 89 | 178 | conventional 2 | F | 13:15 | 368 | 30.01.2015 |
| 70 | 139 | 11% GMO        | F | 13:54 | 368 | 30.01.2015 |
| 70 | 140 | 11% GMO        | F | 14:09 | 368 | 30.01.2015 |
| 29 | 57  | control        | M | 14:25 | 369 | 30.01.2015 |
| 29 | 58  | control        | M | 14:40 | 369 | 30.01.2015 |
| 1  | 1   | 33% GMO        | M | 15:00 | 369 | 30.01.2015 |
| 1  | 2   | 33% GMO        | M | 15:28 | 369 | 30.01.2015 |
| 6  | 11  | 33% GMO        | M | 09:00 | 370 | 31.01.2015 |
| 6  | 12  | 33% GMO        | M | 09:14 | 370 | 31.01.2015 |
| 37 | 73  | conventional 2 | M | 9:21  | 370 | 31.01.2015 |
| 37 | 74  | conventional 2 | M | 9:34  | 370 | 31.01.2015 |
| 19 | 37  | 11% GMO        | M | 09:43 | 370 | 31.01.2015 |
| 19 | 38  | 11% GMO        | M | 09:45 | 370 | 31.01.2015 |
| 24 | 47  | control        | M | 10:04 | 370 | 31.01.2015 |
| 24 | 48  | control        | M | 10:19 | 370 | 31.01.2015 |
| 20 | 39  | 11% GMO        | M | 11:38 | 370 | 31.01.2015 |
| 20 | 40  | 11% GMO        | M | 11:48 | 370 | 31.01.2015 |
| 33 | 65  | conventional 2 | M | 12:07 | 370 | 31.01.2015 |
| 33 | 66  | conventional 2 | M | 12:13 | 370 | 31.01.2015 |
| 68 | 135 | 11% GMO        | F | 08:09 | 371 | 02.02.2015 |
| 68 | 136 | 11% GMO        | F | 08:20 | 371 | 02.02.2015 |
| 85 | 169 | conventional 2 | F | 8:32  | 371 | 02.02.2015 |
| 85 | 170 | conventional 2 | F | 8:55  | 371 | 02.02.2015 |
| 80 | 160 | control        | F | 09:05 | 371 | 02.02.2015 |
| 55 | 109 | 33% GMO        | F | 09:17 | 371 | 02.02.2015 |
| 55 | 110 | 33% GMO        | F | 09:28 | 371 | 02.02.2015 |
| 81 | 161 | conventional 2 | F | 11:52 | 371 | 02.02.2015 |
| 81 | 162 | conventional 2 | F | 12:00 | 371 | 02.02.2015 |
| 67 | 133 | 11% GMO        | F | 12:40 | 371 | 02.02.2015 |
| 67 | 134 | 11% GMO        | F | 12:50 | 371 | 02.02.2015 |
| 75 | 149 | control        | F | 13:00 | 371 | 02.02.2015 |
| 75 | 150 | control        | F | 13:15 | 371 | 02.02.2015 |
| 59 | 118 | 33% GMO        | F | 13:23 | 371 | 02.02.2015 |

|    |     |                |   |       |     |            |
|----|-----|----------------|---|-------|-----|------------|
| 59 | 117 | 33% GMO        | F | 13:36 | 371 | 02.02.2015 |
| 8  | 16  | 33% GMO        | M | 07:53 | 373 | 03.02.2015 |
| 13 | 25  | 11% GMO        | M | 08:34 | 373 | 03.02.2015 |
| 13 | 26  | 11% GMO        | M | 08:44 | 373 | 03.02.2015 |
| 36 | 71  | conventional 2 | M | 8:54  | 373 | 03.02.2015 |
| 25 | 49  | control        | M | 9:20  | 373 | 03.02.2015 |
| 36 | 72  | conventional 2 | M | 9:27  | 373 | 03.02.2015 |
| 25 | 50  | control        | M | 9:40  | 373 | 03.02.2015 |
| 7  | 13  | 33% GMO        | M | 12:29 | 373 | 03.02.2015 |
| 7  | 14  | 33% GMO        | M | 12:37 | 373 | 03.02.2015 |
| 11 | 21  | 11% GMO        | M | 12:49 | 373 | 03.02.2015 |
| 11 | 22  | 11% GMO        | M | 12:58 | 373 | 03.02.2015 |
| 22 | 43  | control        | M | 13:34 | 373 | 03.02.2015 |
| 22 | 44  | control        | M | 13:50 | 373 | 03.02.2015 |
| 34 | 67  | conventional 2 | M | 13:58 | 373 | 03.02.2015 |
| 34 | 68  | conventional 2 | M | 14:09 | 373 | 03.02.2015 |
| 51 | 101 | 33% GMO        | F | 08:22 | 373 | 04.02.2015 |
| 51 | 102 | 33% GMO        | F | 08:37 | 373 | 04.02.2015 |
| 79 | 157 | control        | F | 8:47  | 373 | 04.02.2015 |
| 79 | 158 | control        | F | 8:58  | 373 | 04.02.2015 |
| 63 | 125 | 11% GMO        | F | 09:07 | 373 | 04.02.2015 |
| 63 | 126 | 11% GMO        | F | 09:17 | 373 | 04.02.2015 |
| 84 | 167 | conventional 2 | F | 9:25  | 373 | 04.02.2015 |
| 84 | 168 | conventional 2 | F | 9:35  | 373 | 04.02.2015 |
| 90 | 179 | conventional 2 | F | 11:58 | 373 | 04.02.2015 |
| 90 | 180 | conventional 2 | F | 12:10 | 373 | 04.02.2015 |
| 58 | 115 | 33% GMO        | F | 12:44 | 373 | 04.02.2015 |
| 58 | 116 | 33% GMO        | F | 12:48 | 373 | 04.02.2015 |
| 77 | 153 | control        | F | 13:05 | 373 | 04.02.2015 |
| 77 | 154 | control        | F | 13:16 | 373 | 04.02.2015 |
| 61 | 121 | 11% GMO        | F | 13:24 | 373 | 04.02.2015 |
| 61 | 122 | 11% GMO        | F | 13:37 | 373 | 04.02.2015 |
| 39 | 77  | conventional 2 | M | 8:00  | 375 | 05.02.2015 |
| 39 | 78  | conventional 2 | M | 8:10  | 375 | 05.02.2015 |
| 26 | 51  | control        | M | 8:44  | 375 | 05.02.2015 |
| 26 | 52  | control        | M | 8:55  | 375 | 05.02.2015 |
| 12 | 23  | 11% GMO        | M | 09:06 | 375 | 05.02.2015 |
| 12 | 24  | 11% GMO        | M | 09:15 | 375 | 05.02.2015 |
| 9  | 17  | 33% GMO        | M | 09:26 | 375 | 05.02.2015 |
| 9  | 18  | 33% GMO        | M | 09:40 | 375 | 05.02.2015 |
| 2  | 3   | 33% GMO        | M | 11:53 | 375 | 05.02.2015 |
| 2  | 4   | 33% GMO        | M | 12:05 | 375 | 05.02.2015 |
| 15 | 29  | 11% GMO        | M | 12:54 | 375 | 05.02.2015 |
| 15 | 30  | 11% GMO        | M | 13:10 | 375 | 05.02.2015 |
| 38 | 75  | conventional 2 | M | 13:19 | 375 | 05.02.2015 |
| 38 | 76  | conventional 2 | M | 13:28 | 375 | 05.02.2015 |
| 27 | 53  | control        | M | 13:37 | 375 | 05.02.2015 |
| 27 | 54  | control        | M | 13:50 | 375 | 05.02.2015 |
| 72 | 143 | control        | F | 8:00  | 375 | 06.02.2015 |
| 72 | 144 | control        | F | 8:09  | 375 | 06.02.2015 |

|    |     |                |   |       |     |            |
|----|-----|----------------|---|-------|-----|------------|
| 66 | 132 | 11% GMO        | F | 08:14 | 375 | 06.02.2015 |
| 83 | 165 | conventional 2 | F | 8:27  | 375 | 06.02.2015 |
| 83 | 166 | conventional 2 | F | 8:34  | 375 | 06.02.2015 |
| 57 | 113 | 33% GMO        | F | 09:09 | 375 | 06.02.2015 |
| 57 | 114 | 33% GMO        | F | 09:22 | 375 | 06.02.2015 |
| 60 | 119 | 33% GMO        | F | 11:48 | 375 | 06.02.2015 |
| 60 | 120 | 33% GMO        | F | 12:00 | 375 | 06.02.2015 |
| 87 | 173 | conventional 2 | F | 12:10 | 375 | 06.02.2015 |
| 87 | 174 | conventional 2 | F | 12:20 | 375 | 06.02.2015 |
| 69 | 137 | 11% GMO        | F | 12:47 | 375 | 06.02.2015 |
| 69 | 138 | 11% GMO        | F | 12:55 | 375 | 06.02.2015 |
| 78 | 155 | control        | F | 13:03 | 375 | 06.02.2015 |
| 78 | 156 | control        | F | 13:17 | 375 | 06.02.2015 |

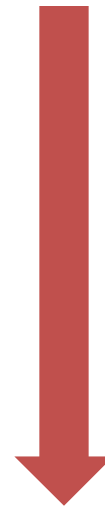

Supplement: 204_2016_1798_MOESM3_ESM.pdf [file 204_2016_1798_MOESM3_ESM.pdf]
